# Supplementary material for: New Promoters for Metabolic Engineering of Ashbya gossypii
Source: MDPI journal article supplement (doi:10.3390/jof7110906), 2021-10-26
Supplement: s1 [file s1]

**Table S4.** Intergenic sequences used for the promoter analyses

| Gene name                                                    | Sequence (5'-3')                                                                                                                                                                                                                                                                                                                                                                                                                                                                                                                                                                                                                                                                                                                                                                                                                                                                                                                                                                                                                                 |
|--------------------------------------------------------------|--------------------------------------------------------------------------------------------------------------------------------------------------------------------------------------------------------------------------------------------------------------------------------------------------------------------------------------------------------------------------------------------------------------------------------------------------------------------------------------------------------------------------------------------------------------------------------------------------------------------------------------------------------------------------------------------------------------------------------------------------------------------------------------------------------------------------------------------------------------------------------------------------------------------------------------------------------------------------------------------------------------------------------------------------|
| <i>AGR049W</i><br>( <i>CCW12</i> )<br>GenBank:<br>AAS54538.1 | GATCCTCGAGATCGGCCGGGTAACCCGCGGCCGCTTCTATTTTAGTATTTCATATCTCAAGCA<br>CATCCATTCCGGCCGTTTGGGGGCGCCGCCGCACTCGTGTCCATTCTACCGTGGCACTTA<br>GGGCTATCCTGTCTGGAGCGCCCCGCCGACCGCCTTATCGGCACCAAAAGTAGAAGCCCCGG<br>CCCCGCGTGGCTCAGACTCACCATCGGTGCTATTTACTTTTCGATCAGATCGCGGCGCGCGG<br>TGGCCGGCATTTCGGAAGCGGCCACGGAGCAGAGGTGGCGCATTGCAATCGCATACGTCT<br>TCGCCACGCCGGAATAAATTTTCGGCTATATAAGGAGAGGCGGCCGCTTGTCTGCAGGCA<br>GTTTCACTTTCTCTAAAACCAAGAACATCGATTTCTTTAGTCACTCGCTTCCTTACACCGAA                                                                                                                                                                                                                                                                                                                                                                                                                                                                                                                                                                            |
| <i>AFR505C</i><br>( <i>TMA10</i> )<br>GenBank:<br>AAS53876.1 | AACCCGGGGCTTCTGAAATTCTATAGCTCTTTAGTGAATCAATTACGGTTTCATAGTCATCCG<br>GCCCCCTCGATGACCTGGCAAGGGGGGTACGTGAGCACAACCTGCGGATAGCACAGCCTTG<br>TGCTCTGCCCCCTAAGTTTCCATTAGAGTACCCCCGCTGGGTATATAAACTGGAGAAAGCG<br>GTTCTCTGACTGATGGAGCTAACAAAGACACGGTTCAGCAGCTAGCAAGAAGTTCAGCAGCT<br>AAGGACACA                                                                                                                                                                                                                                                                                                                                                                                                                                                                                                                                                                                                                                                                                                                                                                 |
| <i>ACR272C</i><br>( <i>CWP1</i> )<br>GenBank:<br>AAS51498.1  | TACCTTCGGAAGTGGTCGCACACGTCTCTACCAGACGGGTACAGATGAACAGCCTGTGCCGC<br>CACTTCGAAACAAAGGGACCAGTAAAGCCTTGCTGGGGCGGCTACAGTGCAGGAGCCATC<br>CGAGGGCTAAATTTGGATCCAAACAAAGAGCTCATAGACAGGGATGAGAATGAATACCTCAC<br>GAGCAGCTCCACCGCATTGCACCCCTGCGAAAATGTTACTTGTAAGCGATTATATCAGCATG<br>GTTACTGTTCCAGTGTTTTGAGCGGCACGTGCGGCCCGCGCAGTACCTGAAATTGCCATAG<br>GGTGACAGATAGATGTAACATAACTTCCGCCCATGTAATAGCAGGTAGCAAGCAATATTGTGG<br>CTTAATTAGCGCCGAAAGGCACGGCAGCAGAGCCAAAATCTCACTTAGTATTCTTTGTAATT<br>GGCAGAGCAATTAACACTTTTCAAGCAGAAAGCGCCAAAGTAACTCGGTTCCGTGGAAGACCA<br>TTGGCTCAGATTGCCTTCGTAGGATACTTCCGCCCATCTTGATGTGTTTGCAATAGCGCACGAA<br>AGATTTACCATGCCATGTATCGACATCGTTGTGTTTCAACGTGATGTGAAGGCACCCGTCCAC<br>ACCTACAAGATCGCAATGCAACTGCTTTCTTTATTTAGAACTTCTCATTGCATCGAAGGGCCT<br>GCTTAAGGACGGGACATAAATTGCGTCATGGTCCCAAGTATACAGCTGACAAAGGCCACCCT<br>AGGGATGCCGACGCCGCAACTTATGGTTAAGCCCCATTTGTTGGCATTATACGAGGTGCTA<br>TTTTTAATGAGTGCCACGACAGGGCCCTTTAGGAGTAAGTCCCAAACGTATATAAAGCGAGAG<br>ATGAATCAACTCTAGTCTATCGCTTAGCAGACTCGGTAAGCAGTCTTTGACAGTCACACAAAC<br>ATCCAACAATTCAA |
| <i>AER312W</i><br>( <i>TSA1</i> )<br>GenBank:<br>AAS52992.1  | ATCATGGCACCTATCTAGTTCAATACGCTTATGCTCCGCCCGCAATTCCGTTTATCTCCGCTC<br>CGTTCTCTGCGCTTCTGGAAGGCTTCGGGCGCTCGGGCGGCCGGGTAATGACCCGGGTG<br>GCAACGGCGCCGCATTAGGGGGGTTGACTGACTGATAACCAAAAAAATATAAAAAAGGCGG<br>CAGATGCGATCAGATTTTGTGGCTGGCCCTTCATACCTCGCCACAACTCTGTAAACAGCAA<br>TTCTACA                                                                                                                                                                                                                                                                                                                                                                                                                                                                                                                                                                                                                                                                                                                                                                      |
| <i>AER031C</i><br>( <i>GPD</i> )<br>GenBank:<br>AAS52715.2   | GTCTGGGTGCACGACACCTGACCTCCGCCCGCGGGCTTCTGTTTTCGCCGGGCGCGGCA<br>CATGGTGCGGCTTCTCCGACAGGAAGCCGGGCCCGGACGCGCACGTGAGAGGCGTCA<br>CCAGGGCAAATGGGTGGAAGCGAAGGGAACACGACGAACGGTCAGCACCCCTGGGGCCC<br>CCACGCTCGCACCACAGCCGCTGCGCGTGCGGTGAAAAATTTTACCTGCGGGCTCTCCTTA<br>CGATCTCCTATTTTATTTCTGGGGGGCAGTCGAAATCTATATAAGAGGGCCCCGGGACGCA<br>CAACGGGAGGACTCTGGTGGAGCGACCAGGAGTTTGAATTAATTCAGTCCACACATACACAC<br>CGCACA                                                                                                                                                                                                                                                                                                                                                                                                                                                                                                                                                                                                                                            |
| <i>AGL366C</i><br>GenBank:<br>AAS54125.1                     | TTACTGATACCAGTCCACATCGGTAGTTTTGTTAATAGCACGCTAATTCTAAAAGCATGGCGAT<br>GTTTCAAATTCCTCTTAATTCCTCGATAGGAGAAGCTGTTCTATAGTTTTGTGTTCTAGTGTACT<br>CGTTCCGCAAATATATATTTCTAATTTAAGCACAACGGTAAATACTATGTCCTTTATTTTCAGATG<br>CAAGAATCGGACCATCTGAATGGTGTCTGCGAAATTCGAGACTCTGTGGAGACACCAATTCT<br>GTTATAGTCTGACCGGCGCAGACATCTGTCCAACAATTGGTCGTGATCAATCAATTAATGAC<br>AAGCTTAGCAGATAATCCTTGGTGTGAGTAGTAAGTCGCATGCCGCAAGGAACACGGAGACG<br>TGCGGCCTTGTGATTACGTCTCGGCATTTTTTCCCTTTATAGAAACGAACTCCGCTAAGAT<br>GCCTCATGCTCTATAGTTAGTAACCAACAGTGGGGTTGGTTATGTACGGCATTTAATCGACAT<br>ACTGAAAATTACCCCTTATGGATTAAGATGAGGCGTTAAGATTTACCTTTGACACCGGAGA<br>TGTTTCGATTCTTTGTATATAATAAGTGTAAGGAATCATGGCATTGTTGGCTGCCAATGACTAA<br>TACTACAGTTATCTGTTTCGAATCTTTAGATTGCGCG                                                                                                                                                                                                                                                                                                              |
| <i>AGR138W</i><br>( <i>SED1</i> )                            | CCGCATAGTCTAATGAAGATTCTTTTATTAGAAACAAAGAGCCCTTTCCTTGCCCTTTGGGGGA<br>TGTCCTGTTTCCATAGGTGTGGCTGGCAGGGTGTGCCCTGTAGGGTGGCTTTAGCGGGCG<br>GCATGATGTACCGCGCGGCGGGTGGGCACGACACCGGGGATTACTACAGATGGACAAAGTT<br>CCTCAAGGGCATCGCTGTACGCGGAGTACTACCGCTCTGGGCCGTGCTGGGAGCGGGA                                                                                                                                                                                                                                                                                                                                                                                                                                                                                                                                                                                                                                                                                                                                                                                  |

|                                                              |                                                                                                                                                                                                                                                                                                                                                                                                                                                                                                                                                                                                                                                                                                                                                                                                                                                                                                                                                                                                                                                                                                     |
|--------------------------------------------------------------|-----------------------------------------------------------------------------------------------------------------------------------------------------------------------------------------------------------------------------------------------------------------------------------------------------------------------------------------------------------------------------------------------------------------------------------------------------------------------------------------------------------------------------------------------------------------------------------------------------------------------------------------------------------------------------------------------------------------------------------------------------------------------------------------------------------------------------------------------------------------------------------------------------------------------------------------------------------------------------------------------------------------------------------------------------------------------------------------------------|
| GenBank:<br>AAS54628.1                                       | AGCATGGAACAGAGCGGAAAATCGGATAGCACGGGCGCGTCGAGAACGCGCGGGAACGGC<br>CCAGCAGGCATTACTGGGGAGCTAGGGACCAGGGCGGGTGCTTCTGTTCTCGGTAGGGGC<br>GGATGCGTGGGGGTTTCGGCTTAGTTGTCTGTGGACAAGATTTGCCGTAGAGACGCAGATG<br>GTGATATTAAGTAGACAGGTAATTAATTGCCTGGCAGGGATCGGAAGGTTGGCCGATCGAGG<br>CGTAAGGGTGCGGGAGTTATTTATGGAATTTTCAGTGCTTGCGCCACAAGCGATTGCTGG<br>GGAAGTTCTATTTTAGCAGCGACTTTGATGGTGTGCGCCAGTATATAAGAAGCATTGGCGAACA<br>AAGAATCTGTATGGTGTTCCTTGTTCCTCACCAAGCCAATTGATCAGATCTGAGTTTGATACTT<br>TAGCCGATTCATCTATCGCTTTCATAAAGTCAG                                                                                                                                                                                                                                                                                                                                                                                                                                                                                                                                                                                        |
| <i>ADL036C</i><br>( <i>CDA2</i> )<br>GenBank:<br>AAS51884.1  | GGCTCGCGCCAGGCACAGGCAACGTAGGGTCCGCGCGCGACGGCGGGGCTGCCGCAGCG<br>CTGCGGCACACGGCGACGGTGACTGGTGGCAGAGCATGGCGACGGCGGGCAGTACCAGCA<br>CAGACGGCGACAGCCGGCGGGCAGCGCAGATACGACGGCGGGAGGGGGCAGTGCAGCGG<br>ACGGCGACGGGCGGACAGAGCACAAAGACAGACTACGGGGGCTATAAGACACCGGGCGGG<br>GCAGGTGTGTTGCGGGTGTGGAAGGGAGCAGTGTCTACGGATAGCGTATCGAGAAGAACA<br>CAGACACAGAGCGACCGTGGAGCAGC                                                                                                                                                                                                                                                                                                                                                                                                                                                                                                                                                                                                                                                                                                                                            |
| <i>AGR408W</i><br>( <i>HSP26</i> )<br>GenBank:<br>ADJ41746.1 | CGTCTGCCCGTGGTGACCGGATGATGGATCTGCTTTCTGCCAATGCACGTGGCAAATGCACG<br>TGCCCGACCGGGTGCTGAATCAGAGCGTTGGAGAATGCAGACGGGCACTTGCACTGGCCTA<br>CAATTTACGGCAGGCACGCGGCGAGGTATATCCTGAGAGGTTTTCGAGACTTGCTCGTAGCT<br>ATTGCTTTTCACGGGGCTAGACCGGCCATTTGTTGGCGGGATGCGCAGCCACGCAGGCTGA<br>CGCTTCGGCCACCTAAACACTAAAGCACTACAGGCCAGCGACTACGCCAGTGTAGCCAAG<br>ATGGTGACAGATGGTGACAGATTCTCAGCGGCAGCAATCGGTTCCGAGCGCTAGAGCGCAG<br>TAACGGCCAACGGCTTGCTGCCGGGTGACAGTATGCATCTGCACCGGAGGCGGGGGCGAT<br>GCTGACCGCTGGCCGGCACGCTGTAGAGGGGCGCAGCCAGCCGTGAGCCGATACTCTATCC<br>CGGATCGACCCAGACGGCGCAGGAATCCCCGGCGCCCAACATATTGGTGTGCAAGGGTTTG<br>GGTTTTACGTGTACTGTATGTGGCAGGCGCTCACTGCTACTTTTTCCGTGTAGGCGGCTTTC<br>TCGCGGGGATGGCCAACTCCGTAAACTACGCGTTCTGCGGTGGTCCGGTGCAGCTACCTT<br>GTGAGCAGATACACACCATATTTAAATGCCCAAACCGACGGCACTACCCTATGCCTTCAGGGC<br>TACGCCCGTAGTTGTTTTGTACCCAGTATTTAGTCCAGTTGCACCTGCCACATATAGTCAC<br>GTGATTGTGATCGACTAGAAAAATCTATAATGTTCCAGCTCCGATGTCAGCGTCATTGTTCTG<br>CCGCACCAGGGGTAGAACCTCCAGCGTATAAATTGAAGTGCAAGAACAAGCTCAGTTCAGTT<br>CCTAGAGCGATCATAAGCAAGAGTTCACCAAAGAGAAATAGTGTTCAACAAATAGCAACTCAG<br>CCTAACAGCAAT |
| <i>AFR038W</i><br>GenBank:<br>AAS53409.1                     | GGACACGTACCTTTGGGATACGCCCCGCCCTAGCATGCTGCAGCAGGCCAGCGCGACGCTG<br>GCAGTCCGCAGCTATTTTAATGCGTCTGCAGTAAGCAACGGCGCCCTTAATATGGCCTGTTA<br>CCCGGTGTTTGAGATGTATTTAAAGGTCTACCCATCGCCTCTGGTAGCGCAAGTCCGGTAGT<br>CATCGCGCAAAACAAAG                                                                                                                                                                                                                                                                                                                                                                                                                                                                                                                                                                                                                                                                                                                                                                                                                                                                              |
| <i>AFR132C</i><br>( <i>PFS1</i> )<br>GenBank:<br>AAS53503.1  | CTTTTTCCATTTTTATAACTCTAACACCGACGCTGACGCTGACGCTCCACAGGAGCAGAGCGT<br>CAAGAGGCGGTATTCTTTGTACACAAATAGAATGAGCTAGAATATAAAAGACCGTAGCTGTCT<br>CAAGGCAATTCAGAATACTATATACAAAAAAGTATAGCACCTCCTTCCAG                                                                                                                                                                                                                                                                                                                                                                                                                                                                                                                                                                                                                                                                                                                                                                                                                                                                                                            |
