# Supplementary material for: New Promoters for Metabolic Engineering of Ashbya gossypii
Source: MDPI journal article supplement (doi:10.3390/jof7110906), 2021-10-26
Supplement: s1 [file s1]

**Table S2.** Relevant sequences of the integrative cassettes

| Sequence name                                                                      | Sequence (5'-3')                                                                                                                                                                                                                                                                                                                                                                                                                                                                                                                                                                                                                                                                                                                                                                                                                                                                                                                            |
|------------------------------------------------------------------------------------|---------------------------------------------------------------------------------------------------------------------------------------------------------------------------------------------------------------------------------------------------------------------------------------------------------------------------------------------------------------------------------------------------------------------------------------------------------------------------------------------------------------------------------------------------------------------------------------------------------------------------------------------------------------------------------------------------------------------------------------------------------------------------------------------------------------------------------------------------------------------------------------------------------------------------------------------|
| <i>ADR304W</i> -left flank                                                         | AGTCCAAAACAGGGGAGCAGCGTGTAGAGCGCGCTAAGCCGGAGAACGTGGAGGAGGC<br>ACTGCGCCTGATTGAGGACCTGAAGTTCTTTCTTGCCACGGCGCCCGCAACTGGCAGG<br>AAAACCAGGTGATCCGACGCTACTACTTGAACAACGACGAAGGCTTTGTGTCGTGCGTGT<br>TCTGGAACAATCTGTACTATATCACGGGGACGGACATTGTGCGATGCTGCGTGTACCGCA<br>TGCAGAAGTTCGGCCGCGAGGTTGTGCAACGCAAGAAATTCGAGGAGGGGATCTTCTCT<br>GATCTGCGGAACCTAAAGTGTGGGGTGGACGCCACGCTGGAGATGCCCAAGTCTGAGTT<br>TCTGTCGTTTTCTGTACAAGAATCTGTGTCTGAAGACGCAGAAGAAGCAAAAGGTATTCTTC<br>TGGTTTCAGCGTACCGCACGACAAGCTGTTTTCGGGACGCTCTGGAGCGAGATTTGCGCCG<br>CGAGGTGGCCGGCCAGCCGTCTACCACCCGCGCCATAGCGGAGCCTGCGCTGACCTTT<br>CGATACGACGACCAGTCTGGAACGTCGCTCTACGATCAGGTCGTACAGCATGTGG                                                                                                                                                                                                                                                                                          |
| <i>ADR304W</i> -right flank                                                        | ACACTGATGACGATCCCAGCAACGAGGATCAGGATTCCGATAACGTCAACGAACCGATAG<br>AAGAACATGTTCCGATTTCAAATAATCCAGAAATAGTAGTGGGATGGGTGCTTTTCCGCC<br>GCAAGATGCATACCTCGGCTACCAAGGCGTACCGCCAGCTGCCATGTATCCATATGTTAT<br>GCCAGATGTTTTCTACAATAATACATATCCAGGCGGCGATGAGTTGTATGAACAATGGATG<br>CATATGCAGTTTTGGTCAACCACAGCAGAATGATCTGTTTCATGCCCCGCAAGCGCCATTT<br>ATGGGGCGCTCTTTCACTCCAATATACCGTACCACACCAACAAATCCATACATGGCCATTT<br>CTCCATATCAGTCAAAGCCTCCTACGTCTTCTACTGCAAAAACTTTCCATTTTATCAGGG<br>ATATTATGGTCGACGGGGAAATATGCACTCATACCTACGCGGATTCCCCTCGATCCAAGC<br>CACACAGCCTTCTTCTGCCACGCGCATGCACTTTGTTAAGCACAACAGGGTAGGCACTCA<br>AATGCGGCTGCATC                                                                                                                                                                                                                                                                                                                           |
| <i>AGL034C</i> -left flank                                                         | TGTGTCAAGTTCGATGGGCGGTATTTTGTCTAGCAACTAAAAGCTATATAAGGGCAACG<br>ATCCCTCATCTATTCAATCGTCTGGTTCGTATTCCCCACTCAATTCTAAGCTATTCATCAGT<br>CAACGAGAAAGTTCTTAGACAAACAAGAAACATTATAGGAAATGAAAACCGCCAACGTTCTA<br>ACCGCTTTTGCTGCATCTACCGCCTTGTCGCTAACCCAGCCAGTGCATTCATCACAAC<br>GGTGCCGGAGCACCTCAAGTGGATGACAATCCAAAAGACGCCTGCTACGTAGCCGAGTT<br>CCCACAAGCCGGGAGCGACAAAGTAGCAGGTTACGTTACATTCACAGCATATGAAGGCAT<br>GACCAAGGTCAGCGTCGACTTGCCACTGTGGTAAATCCAGAGGACGAAGGATTCTCCT<br>ACCACGTTACGAAAAGCCAATTGAATCGGGAGATGAGTGTGCATGTTACGGAAACGGTG<br>ACGAAGTCGACCCATACACTGGCATTGCTAGTTGCTCAGATGTCAAGGACAAATCTCTAT<br>GTAAGGTCGGTGACCTAAGTGGCAAATACGGGAACATAGAGTCCAATGTGTTCAAAGCGA<br>AATATTTGGACCCATATCTAGGGCTATACAGCTCATCCCCAAGTTTTATTGGAGTTCGCTC<br>CCTAACAAATACACAACGGCGACAAGAGGCTAGCGTGT                                                                                                                                                                        |
| <i>AGL034C</i> -right flank                                                        | GCCTGAGGAGCAGCCTGAAGACAAGCCTGAAGACAAGCCAGAGGAACCCAGAGGACAAG<br>CCAGAGGAACCCAGAGGAGCAGCCAGAAGGACCTGGTGTTCCAGCTCCAAAGGAACCTGA<br>GACTCCAGAAGGCGAAACCCCAAGGTCCAACCGGTCCAGGTGTCCAGCTCCAGAGG<br>CTCCAGAGGCTCCAGAAGCTCCAGAAGCTCCAGAGGCACCAAGCTCCAGAAGGCCCA<br>ACCGGTCCAGGTGTCCAGCTCCAGAGGCTCCAGCTCCAGAGGCCCAAGTCCAGATCCAGA<br>AGGCCCAACCGGTCCAGGTGTCCAGCTCCAGAGGCTCCAGAGCTCCAGAGGCTCCA<br>GAGGTTCAGAGGCTCCAGAAGCTCCAGAGGCTCCAGAGGCTCCAGAGGCTCCAGAGG<br>CTCCAGAGGCTCCAGAGGTTCCAGAGGCTCCAGAGGCTCCAGAGGCTCCAAGTGTCCCA<br>TCACCCGCTCCAGAAGTTCGAAGTGGCCAGGTGTTCTGCAACAGCTCCTACCTCTGTT<br>CCAGACGGAAGACCTGCCCCAGTCATCCCAT                                                                                                                                                                                                                                                                                                                               |
| <i>Renilla</i> luciferase from plasmid pRL-SV40 (NCBI accession number AF025845.2) | ATGACTTCGAAAGTTTATGATCCAGAACAAAGGAAACGGATGATAACTGGTCCGCAGTGG<br>TGGGCCAGATGTAAACAAATGAATGTTCTTGATTCATTTATTAATTATTATGATTCAGAAAA<br>ACATGCAGAAAAATGCTGTTATTTTTTACATGGTAACGCGGCCTCTTCTTATTTATGGCGA<br>CATGTTGTGCCACATATTGAGCCAGTAGCGCGGTGTATTATACCAGACCTTATTGGTATG<br>GGCAAATCAGGCAAATCTGGTAATGGTTCTTATAGGTTACTTGATCATTACAAATATCTTAC<br>TGCATGGTTTTGAAGTTCTTAATTTACCAAGAAGATCATTTTTGTGCGCCATGATTGGGGT<br>GCTTGTTTGGCATTTTCATTATAGCTATGAGCATCAAGATAAGATCAAAGCAATAGTTCACG<br>CTGAAAGTGTAGTAGATGTGATTGAATCATGGGATGAATGGCCTGATATTGAAGAAGATAT<br>TGCGTTGATCAAATCTGAAGAAGGAGAAAAAATGTTTTGGAGAATAACTTCTTCGTGGAA<br>ACCATGTTGCCATCAAAAAATCATGAGAAAGTTAGAACCAGAAGAATTTGCAGCATATCTTG<br>AACCATTCAAAGAGAAAGGTGAAGTTCGTCGTCCAACATTATCATGGCCTCGTGAAATCC<br>CGTTAGTAAAAGGTGGTAAACCTGACGTTGTACAAATTGTTAGGAATTATAATGCTTATCTA<br>CGTGCAAGTGATGATTTACCAAAAATGTTTATTGAATCGGACCCAGGATTCTTTTCCAATG<br>CTATTGTTGAAGGTGCCAAGAAGTTTCTAATACTGAATTTGTCAAAGTAAAAGGTCTTCAT |

|                                                                                            |                                                                                                                                                                                                                                                                                                                                                                                                                                                                                                                                                                                                                                                                                                                                                                                                                                                                                                                                                                                                                                                                                                                                                                                                                                                                                                                                                                                                                                                                                                                                                                                                                                                                                                                                                                                                                          |
|--------------------------------------------------------------------------------------------|--------------------------------------------------------------------------------------------------------------------------------------------------------------------------------------------------------------------------------------------------------------------------------------------------------------------------------------------------------------------------------------------------------------------------------------------------------------------------------------------------------------------------------------------------------------------------------------------------------------------------------------------------------------------------------------------------------------------------------------------------------------------------------------------------------------------------------------------------------------------------------------------------------------------------------------------------------------------------------------------------------------------------------------------------------------------------------------------------------------------------------------------------------------------------------------------------------------------------------------------------------------------------------------------------------------------------------------------------------------------------------------------------------------------------------------------------------------------------------------------------------------------------------------------------------------------------------------------------------------------------------------------------------------------------------------------------------------------------------------------------------------------------------------------------------------------------|
|                                                                                            | TTTTCGCAAGAAGATGCACCTGATGAAATGGGAAAAATATATCAAATCGTTCGTTGAGCGAG<br>TTCTCAAAAATGAACAATAG                                                                                                                                                                                                                                                                                                                                                                                                                                                                                                                                                                                                                                                                                                                                                                                                                                                                                                                                                                                                                                                                                                                                                                                                                                                                                                                                                                                                                                                                                                                                                                                                                                                                                                                                   |
| Firefly luciferase<br>from plasmid<br>pRL-SV40 (NCBI<br>accession<br>number<br>AF025845.2) | ATGGAAGACGCCAAAAACATAAAGAAAGGCCCGGCCATTCTATCCTCTAGAGGATGGA<br>ACCGCTGGAGAGCAACTGCATAAGGCTATGAAGAGATACGCCCTGGTTCCTGGAACAATT<br>GCTTTTACAGATGCACATATCGAGGTGAACATCACGTACGCGGAATACTTCGAAATGTCC<br>GTTCCGTTGGCAGAAGCTATGAAACGATATGGGCTGAATACAAATCACAGAATCGTCGTA<br>TGCAGTGAAAACTCTCTTCAATTCTTTATGCCGGTGTGGGCGCGTTATTTATCGGAGTTG<br>CAGTTGCGCCCGCGAACGACATTATAATGAACGTGAATTGCTCAACAGTATGAACATTTT<br>GCAGCCTACCGTAGTGTTTGTTCCTCAAAAAGGGGTTGCAAAAAATTTTGAACGTGCAAAAA<br>AAATTACCAATAATCCAGAAAATTATTATCATGGATTCTAAAACGGATTACCAGGGATTTC<br>GTCGATGTACACGTTTCGTACATCTCATCTACCTCCCGGTTTTAATGAATACGATTTTGTA<br>CCAGAGTCCTTTGATCGTGACAAAACAATTGCACTGATAATGAATTCTCTGGATCTACTG<br>GGTTACCTAAGGGTGTGGCCCTTCCGCATAGAAGTGCCTGCGTCAGATTCTCGCATGCCA<br>GAGATCCTATTTTTGGCAATCAAATCATTCCGGATACTGCGATTTTAAGTGTTGTTCCATTC<br>CATCACGGTTTTTGAATGTTTACTACACTCGGATATTTGATATGTGGATTTTCGAGTCGTCT<br>TAATGTATAGATTTGAAGAGGAGCTGTTTTTACGATCCCTTCAGGATTACAAAATTCAAAGT<br>GCGTTGCTAGTACCAACCCTATTTTCATTCTTCGCCAAAAGCACTCTGATTGACAAATACG<br>ATTTATCTAATTTACACGAAATTGCTTCTGGGGGCGCACCTCTTCGAAAGAAGTCGGGGA<br>AGCGGTTGCAAAACGCTTCCATCTTCCAGGGATACGACAAGGATATGGGCTCACTGAGAC<br>TACATCAGCTATTCTGATTACACCCGAGGGGGATGATAAACCGGGCGCGGTTCGGTAAAGT<br>TGTTCCATTTTTTGAAGCGAAGGTTGTGGATCTGGATACCGGGAAAACGCTGGGCGTTAA<br>TCAGAGAGGCGAATTATGTGTCAGAGGACCTATGATTATGTCCGTTATGTAAACAATCC<br>GGAAGCGACCAACGCCTTGATTGACAAGGATGGATGGCTACATTCTGGAGACATAGCTTA<br>CTGGGACGAAGACGAACACTTCTTCATAGTTGACCGCTTGAAGTCTTTAATTAATACAAA<br>GGATATCAGGTGGCCCCCGCTGAATTGGAATCGATATTGTTACAACACCCCAACATCTTC<br>GACGCGGGCGTGGCAGGTCTTCCCGACGATGACGCCGGTGAACCTCCCGCCGCCGTTG<br>TTGTTTTGGAGCACGAAAGACGATGACGAAAAAGAGATCGTGATTACGTCGCCAGTC<br>AAGTAACAACCGCGAAAAAGTTGCGCGGAGGAGTTGTGTTTGTGGACGAAGTACCGAAA<br>GGTCTTACCGGAAAACTCGACGCAAGAAAAATCAGAGAGATCCTCATAAAGGCCAAGAAG<br>GGCGGAAAGTCCAAATTGTAG |
