# Supplementary material for: New Promoters for Metabolic Engineering of Ashbya gossypii
Source: MDPI journal article supplement (doi:10.3390/jof7110906), 2021-10-26
Supplement: s1 [file s1]

| Promoter                | $P_{GPD}$<br>relative<br>promoter<br>activity |                  |
|-------------------------|-----------------------------------------------|------------------|
| <i>PCCW12</i>           | 4.96                                          | Strong promoters |
| <i>PS<sub>ED1</sub></i> | 4.50                                          |                  |
| <i>PTSA1</i>            | 3.33                                          |                  |
| <i>PHSP26</i>           | 0.24                                          | Medium promoters |
| <i>PAGL366C</i>         | 0.11                                          |                  |
| <i>PTMA10</i>           | 0.11                                          |                  |
| <i>PCWP1</i>            | 0.05                                          | Weak promoters   |
| <i>PAFR038W</i>         | 0.03                                          |                  |
| <i>PPFS1</i>            | 0.02                                          |                  |
| <i>PCDA2</i>            | 0.02                                          |                  |

| Gene           | <i>GPD</i><br>relative<br>gene<br>expresion | $P_{GPD}$<br>relative<br>promoter<br>activity |
|----------------|---------------------------------------------|-----------------------------------------------|
| <i>CCW12</i>   | 6.64                                        | 4.96                                          |
| <i>TMA10</i>   | 4.63                                        | 0.11                                          |
| <i>CWP1</i>    | 1.86                                        | 0.05                                          |
| <i>TSA1</i>    | 1.66                                        | 3.33                                          |
| <i>AGL366C</i> | 0.92                                        | 0.11                                          |
| <i>SED1</i>    | 0.85                                        | 4.50                                          |
| <i>CDA2</i>    | 0.83                                        | 0.02                                          |
| <i>HSP26</i>   | 0.33                                        | 0.24                                          |
| <i>AFR038W</i> | 0.17                                        | 0.03                                          |
| <i>PFS1</i>    | 0.005                                       | 0.02                                          |
