# Supplementary material for: New Promoters for Metabolic Engineering of Ashbya gossypii
Source: MDPI journal article supplement (doi:10.3390/jof7110906), 2021-10-26
Supplement: s1 [file s1]

**Table S1.** *A. gossypii* strains used in this study.

| Strain | Genotype                                                                                                                                                | Source        |
|--------|---------------------------------------------------------------------------------------------------------------------------------------------------------|---------------|
| WT     | Wild type (ATCC 10895)                                                                                                                                  | our lab stock |
| A751   | <i>MSN2</i> $\Delta$                                                                                                                                    | our lab stock |
| A783   | <i>P<sub>GPD1</sub>-MSN2</i>                                                                                                                            | our lab stock |
| A846   | <i>adr304w::loxP-kanMX-loxP-P<sub>GPD1</sub>-Renilla-T<sub>PGK1</sub></i> ; Gt <sup>R</sup>                                                             | this work     |
| A848   | <i>adr304w::P<sub>GPD1</sub>-Renilla-T<sub>PGK1</sub></i>                                                                                               | “             |
| A855   | <i>adr304w::P<sub>GPD1</sub>-Renilla-T<sub>PGK1</sub></i> ; <i>agl034c::loxP-kanMX-loxP-P<sub>GPD1</sub>-Firefly-T<sub>PGK1</sub></i> ; Gt <sup>R</sup> | “             |
| A947   | <i>adr304w::P<sub>GPD1</sub>-Renilla-T<sub>PGK1</sub></i> ; <i>agl034c::P<sub>GPD1</sub>-Firefly-T<sub>PGK1</sub></i>                                   | “             |
| A986   | <i>adr304w::P<sub>GPD1</sub>-Renilla-T<sub>PGK1</sub></i> ; <i>agl034c::P<sub>SED1</sub>-Firefly-T<sub>PGK1</sub></i>                                   | “             |
| A987   | <i>adr304w::P<sub>GPD1</sub>-Renilla-T<sub>PGK1</sub></i> ; <i>agl034c::P<sub>AGL366C</sub>-Firefly-T<sub>PGK1</sub></i>                                | “             |
| A988   | <i>adr304w::P<sub>GPD1</sub>-Renilla-T<sub>PGK1</sub></i> ; <i>agl034c::P<sub>TMA10</sub>-Firefly-T<sub>PGK1</sub></i>                                  | “             |
| A989   | <i>adr304w::P<sub>GPD1</sub>-Renilla-T<sub>PGK1</sub></i> ; <i>agl034c::P<sub>PFS1</sub>-Firefly-T<sub>PGK1</sub></i>                                   | “             |
| A990   | <i>adr304w::P<sub>GPD1</sub>-Renilla-T<sub>PGK1</sub></i> ; <i>agl034c::P<sub>HSP26</sub>-Firefly-T<sub>PGK1</sub></i>                                  | “             |
| A991   | <i>adr304w::P<sub>GPD1</sub>-Renilla-T<sub>PGK1</sub></i> ; <i>agl034c::P<sub>TSA1</sub>-Firefly-T<sub>PGK1</sub></i>                                   | “             |
| A992   | <i>adr304w::P<sub>GPD1</sub>-Renilla-T<sub>PGK1</sub></i> ; <i>agl034c::P<sub>CWP1</sub>-Firefly-T<sub>PGK1</sub></i>                                   | “             |
| A993   | <i>adr304w::P<sub>GPD1</sub>-Renilla-T<sub>PGK1</sub></i> ; <i>agl034c::P<sub>CCW121</sub>-Firefly-T<sub>PGK1</sub></i>                                 | “             |
| A997   | <i>adr304w::P<sub>GPD1</sub>-Renilla-T<sub>PGK1</sub></i> ; <i>agl034c::P<sub>AFR038</sub>-Firefly-T<sub>PGK1</sub></i>                                 | “             |
| A998   | <i>adr304w::P<sub>GPD1</sub>-Renilla-T<sub>PGK1</sub></i> ; <i>agl034c::P<sub>CDA2</sub>-Firefly-T<sub>PGK1</sub></i>                                   | “             |
| A1121  | <i>P<sub>TSA1</sub>-MSN2</i>                                                                                                                            | “             |
| A1127  | <i>P<sub>SED1</sub>-MSN2</i>                                                                                                                            | “             |
| A1128  | <i>P<sub>AGL366C</sub>-MSN2</i>                                                                                                                         | “             |
| A1129  | <i>P<sub>AFR038W</sub>-MSN2</i>                                                                                                                         | “             |
