# Supplementary material for: New Promoters for Metabolic Engineering of Ashbya gossypii
Source: MDPI journal article supplement (doi:10.3390/jof7110906), 2021-10-26
Supplement: s1 [file s1]

**Table S3.** List of primers used in this study.

| Primer           | Sequence*                                       | Purpose                            |
|------------------|-------------------------------------------------|------------------------------------|
| Firefly-SapD-fw  | 5'-GAAGAGGAGCTGTTTTACGATCCCTCAGGATTA-3'         | Firefly cloning                    |
| Firefly-SapD-rv  | 5'-AACAGCTCCTCTTCAAATCTATACATTAAGACGACTCG-3'    | Firefly cloning                    |
| Firefly-GATG-fw  | 5'-TTTTTGGTCTCAGATGGAAGACGCCAAAAACATAA-3'       | Firefly cloning                    |
| Firefly-TAGT-rv  | 5'-AAAAAGGTCTCAACTACAATTTGGACTTTCCGCCC-3'       | Firefly cloning                    |
| Renilla-GATG-fw  | 5'-TTTTTGGTCTCAGATGACTTCGAAAGTTTATGATCCAGA-3'   | Renilla cloning                    |
| Renilla-TAGT-rv  | 5'-AAAAAGGTCTCAACTATTGTTCAATTTTGGAGAACTCGCTC-3' | Renilla cloning                    |
| GGTC-CCW12p-fw   | 5'-TTTTTGGTCTCGGGTCGATCCTCGAGATCGGCCG-3'        | <i>P<sub>CCW12</sub></i> cloning   |
| GATG-CCW12p-rv   | 5'-AAAAAGGTCTCACATCTTCGGTGTAAGGAAGCGAGT-3'      | <i>P<sub>CCW12</sub></i> cloning   |
| GGTC-CWP1p-fw    | 5'-TTTTTGGTCTCGGGTCACCTTCGGAAGTGGTCGCA-3'       | <i>P<sub>CWP1</sub></i> cloning    |
| GATG-CWP1p-rv    | 5'-AAAAGGTCTCACATCTTGAATTGTTGGATGTTTGTGTGAC-3'  | <i>P<sub>CWP1</sub></i> cloning    |
| GGTC-TSA1p-fw    | 5'-TTTTGGTCTCGGGTCATCATGGCACCTATCTAGTT-3'       | <i>P<sub>TSA1</sub></i> cloning    |
| GATG-TSA1p-rv    | 5'-AAAAAGGTCTCACATCTGTAGAATTGCTGTTTACAGA-3'     | <i>P<sub>TSA1</sub></i> cloning    |
| GGTC-AFR038Wp-fw | 5'-TTTTTGGTCTCGGGTCGGACACGTACCTTTGGGATA-3'      | <i>P<sub>AFR038W</sub></i> cloning |
| GATG-AFR038Wp-rv | 5'-AAAAGGTCTCACATCCTTTGTTTTGCGCGATGACT-3'       | <i>P<sub>AFR038W</sub></i> cloning |
| GGTC-CDA2p-fw    | 5'-TTTTGGTCTCGGGTCGGCTCGCGCCAGGCACAGGCAACGT-3'  | <i>P<sub>CDA2</sub></i> cloning    |
| GATG-CDA2p-rv    | 5'-AAAAAGGTCTCACATCGCTGCTCCACGGTCGCT-3'         | <i>P<sub>CDA2</sub></i> cloning    |
| GGTC-TMA10p-fw   | 5'-TTTTGGTCTCGGGTCAACCCGGGGCTTCTGAAATTC-3'      | <i>P<sub>TMA10</sub></i> cloning   |
| GATG-TMA10p-rv   | 5'-AAAAAGGTCTCACATCTGTGTCCTTAGCTGCTGAACT-3'     | <i>P<sub>TMA10</sub></i> cloning   |
| GGTC-SED1p-fw    | 5'-TTTTGGTCTCGGGTCCCGCATAGTCTAATGAAGATTCTTT-3'  | <i>P<sub>SED1</sub></i> cloning    |
| GATG-SED1p-rv    | 5'-AAAAAGGTCTCACATCTGACTTTATGAAAGCGATAGGATG-3'  | <i>P<sub>SED1</sub></i> cloning    |
| GGTC-AGL366p-fw  | 5'-TTTTGGTCTCGGGTCTTACTGATACCAGTCCACATCGGT-3'   | <i>P<sub>AGL366C</sub></i> cloning |
| GATG-AGL366p-rv  | 5'-AAAGGTCTCACATCCGCGCAATCTAAAGATTGAAACA-3'     | <i>P<sub>AGL366C</sub></i> cloning |
| GGTC-HSP26p-fw   | 5'-TTTTGGTCTCGGGTCCGTCTGCCCCGTGGTGACC-3'        | <i>P<sub>HSP26</sub></i> cloning   |
| GATG-HSP26p-rv   | 5'-AAAAAGGTCTCACATCATTGCTGTTAGGCTGAGTTGC-3'     | <i>P<sub>HSP26</sub></i> cloning   |
| GGTC-PFS1p-fw    | 5'-TTGGTCTCGGGTCCTTTTCCATTTTATAACTCTAACAC-3'    | <i>P<sub>PFS1</sub></i> cloning    |
| GATG-PFS1p-rv    | 5'-AAAAAGGTCTCACATCCTGGAAGGAGGTGCTATACT-3'      | <i>P<sub>PFS1</sub></i> cloning    |
| kanB             | 5'-CTGCAGCGAGGAGCCGTAAT-3'                      | analytical PCR                     |
| AGL034C-a        | 5'-CAGCTCATCACAAACGCTTATCCA-3'                  | analytical PCR                     |
| ADR304-a         | 5'-TGTCGGTGCTCAAGACAGAC-3'                      | analytical PCR                     |

|                                     |                                                                                                                        |                 |
|-------------------------------------|------------------------------------------------------------------------------------------------------------------------|-----------------|
| loxPMK-P <sub>GPD1</sub> -MSN2-ins5 | 5'-<br>AGCAGCAGATAAGGTGAGAACAAAAGCGTCCGGATAGCGAAGCAAGC<br>TATAACGGTATAGAGCAGCCGTACACTAAGTGTCGGATCCCCGGGTTA<br>ATTAA-3' | MSN2-expression |
| P <sub>AGL366C</sub> -MSN2-ins3     | 5'-<br>CCTGTCAGACCCATGGCCGTCGCGCCCTGCCCTAACTCAGCGCCAAG<br>AAGATACGCTGTGTATTCTGCAGAAGTCATCGCGCAATCTAAAGATTC<br>GAAAC-3' | MSN2-expression |
| P <sub>SED1</sub> -MSN2-ins3        | 5'-<br>TGTCAGACCCATGGCCGTCGCGCCCTGCCCTAACTCAGCGCCAAGAA<br>GATACGCTGTGTATTCTGCAGAAGTCATCTGACTTTATGAAAGCGATA<br>GGATG-3' | MSN2-expression |
| P <sub>AFR038W</sub> -MSN2-ins3     | 5'-<br>GCCCCTGTCAGACCCATGGCCGTCGCGCCCTGCCCTAACTCAGCGCC<br>AAGAAGATACGCTGTGTATTCTGCAGAAGTCATCTTTGTTTTGCGCGA<br>TGACT-3' | MSN2-expression |
| P <sub>TSA1</sub> -MSN2-ins3        | 5'-<br>GTCAGACCCATGGCCGTCGCGCCCTGCCCTAACTCAGCGCCAAGAAG<br>ATACGCTGTGTATTCTGCAGAAGTCATTGTAGAATTGCTGTTTACAGAG<br>TTTG-3' | MSN2-expression |
| MSN2-a                              | 5'-CAAGTCCCGCTACAGAACCA-3'                                                                                             | analytical PCR  |
| UBC6-qPCR-fw                        | 5'-TCCGCCC GCGATCAGGATG-3'                                                                                             | qRT-PCR         |
| UBC6-qPCR-rv                        | 5'-CTTGCGCTTCGTGGAGTCCGTAGA-3'                                                                                         | qRT-PCR         |
| MSN2-qPCR-fw                        | 5'-CAGGCGGAGCAGCAGTTCAT-3'                                                                                             | qRT-PCR         |
| MSN2-qPCR-rv                        | 5'-CCCGATACGCCCGATAGCAT-3'                                                                                             | qRT-PCR         |

---

\**Bsa*I sites are underlined. 4-nt overhangs are indicated in bold
