# Supplementary figures and images for: New Promoters for Metabolic Engineering of Ashbya gossypii
Source: MDPI journal article supplement (doi:10.3390/jof7110906), 2021-10-26

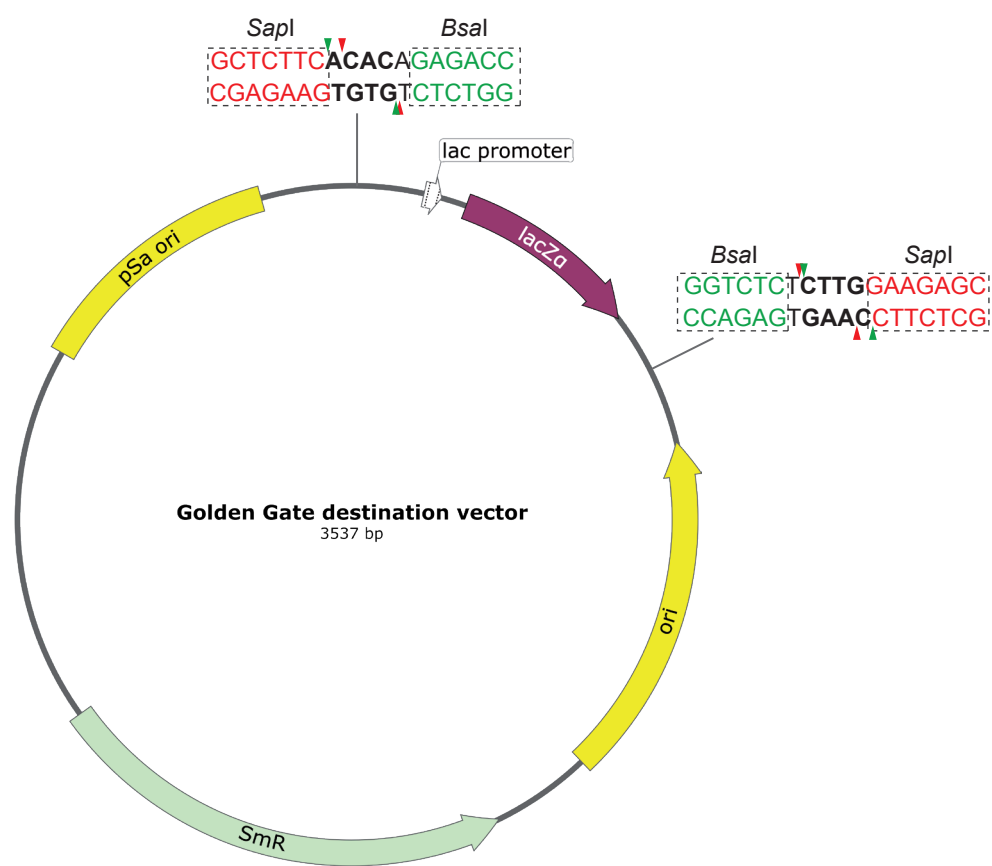

Supplement: s1 [file s1]
